# **A Complete Logical Approach to Resolve the Evolution and Dynamics of Mitochondrial Genome in Bilaterians**

3

4 **Laurent Oxusoff<sup>1</sup>, Pascal Pr  a<sup>2</sup>, Yvan Perez<sup>3\*</sup>**

5 <sup>1</sup> Laboratoire des Sciences de l'Information et des Syst  mes UMR 7296, Aix-Marseille

6 Universit  , Universit   de Toulon, CNRS, ENSAM, Marseille, France

7 <sup>2</sup> Laboratoire d'Informatique Fondamentale de Marseille UMR 7269, Aix-Marseille

8 Universit  , CNRS, Ecole Centrale Marseille, Technopole de Chateau-Gombert, Marseille,

9 France

10 <sup>3</sup> Institut M  diterran  en de Biodiversit   et d'Ecologie marine et continentale UMR 7263, Aix-

11 Marseille Universit  , Avignon Universit  , CNRS, IRD, Marseille, France

12 \* Corresponding author

13 [yvan.perez@imbe.com](mailto:yvan.perez@imbe.com)

14

## **Abstract**

16 A new method of genomic maps analysis based on formal logic is described. The purpose of  
17 the method is to 1) use mitochondrial genomic organisation of current taxa as datasets 2)  
18 calculate mutational steps between all mitochondrial gene arrangements and 3) reconstruct  
19 phylogenetic relationships according to these calculated mutational steps within a dendrogram  
20 under the assumption of maximum parsimony. Unlike existing methods mainly based on the  
21 probabilistic approach, the main strength of this new approach is that it calculates all the exact  
22 tree solutions with completeness and provides logical consequences as very robust results.  
23 Moreover, the method infers all possible hypothetical ancestors and reconstructs character

24 states for all internal nodes (ancestors) of the trees. We started by testing the method using the  
 25 deuterostomes as a study case. Then, with sponges as an outgroup, we investigated the  
 26 mutational network of mitochondrial genomes of 47 bilaterian phyla and emphasised the  
 27 peculiar case of chaetognaths. This pilot work showed that the use of formal logic in a  
 28 hypothetico-deductive background such as phylogeny (where experimental testing of  
 29 hypotheses is impossible) is very promising to explore mitochondrial gene rearrangements in  
 30 deuterostomes and should be applied to many other bilaterian clades.

### 31 **Author Summary**

32 Investigating how recombination might modify gene arrangements during the evolution of  
 33 metazoans has become a routine part of mitochondrial genome analysis. In this paper, we  
 34 present a new approach based on formal logic that provides optimal solutions in the genome  
 35 rearrangement field. In particular, we improve the sorting by including all rearrangement  
 36 events, *e.g.*, transposition, inversion and reverse transposition. The problem we face with is to  
 37 find the most parsimonious tree(s) explaining all the rearrangement events from a common  
 38 ancestor to all the descendants of a given clade (hereinafter PHYLO problem). So far, a  
 39 complete approach to find all the correct solutions of PHYLO is not available. Formal logic  
 40 provides an elegant way to represent and solve such an NP-hard problem. It has the benefit of  
 41 correctness, completeness and allows the understanding of the logical consequences (results  
 42 true for all solutions found). First, one must define PHYLO (axiomatisation) with a set of  
 43 logic formulas or constraints. Second, a model generator calculates all the models, each model  
 44 being a solution of PHYLO. Several complete model generators are available but a recurring  
 45 difficulty is the computation time when the data set increases. When the search of a solution  
 46 takes exponential time, two computing strategies are conceivable: an incomplete but fast  
 47 algorithm that does not provide the optimal solution (for example, use local improvements  
 48 from an initial random solution) or a complete – and thus not efficient – algorithm on a

49 smaller tractable dataset. While the large amount of genes found in the nuclear genome  
50 strongly limits our possibility to use of formal logic with any conventional computer, we  
51 show in our paper that, for bilaterian mtDNAs, all the correct solutions can be found in a  
52 reasonable time due to the small number of genes.

## 53 **Introduction**

54 Unlike nuclear genomes, mitochondrial genomes (mtDNAs) are rather small and simply  
55 structured. In eukaryotes, they are considered relics of bacterial genomes and consist of  
56 circular DNA about 16 kb in size that, as a result of ancient intracellular symbiosis, have only  
57 retained a few well-characterized genes: 13 protein subunits (nad1-6, nad4L, cox1-3, cob and  
58 atp6/8), 2 rRNAs (rrnL, rrnS) and a maximum of 22 tRNAs [1]. Recently, the emergence of  
59 next-generation sequencing techniques has significantly increased the amount of mtDNAs  
60 available in public databases. The comparative analysis of this growing amount of data has  
61 helped to broaden our understanding of the evolution of mtDNAs in metazoans. Because it is  
62 assumed that nuclear genomes underwent similar evolutionary processes, it has been proposed  
63 that comparative analysis of mtDNAs could shed a new light on the mechanisms and selective  
64 forces driving whole-genome evolution in genomic data that are more tractable [2].

65 MtDNAs have also proven valuable for evolutionary studies in eukaryotes [1, 3-5]. Primary  
66 sequences from mitochondrial (mt) genes and mt control regions have not only yielded  
67 significant insights into the phylogenetic relationships of numerous taxa but have also been  
68 informative for population genetic investigations due to their maternal inheritance and high  
69 mutation rates. However, mutation rates vary considerably between species and several  
70 studies of metazoan relationships have suggested that they can be problematic to infer  
71 phylogenies [6].

Besides the primary sequence information, the organisation of the genome itself has also proven to be a reliable marker for phylogenetic inferences at many taxonomic levels for several reasons [4, 7]. First, the gene content is almost invariant in metazoans and provides a unique and universal dataset. Second, stable structural gene rearrangements are assumed to be rare because functional genomes must be maintained, which limits the level of homoplasy [8]. However, relying on mt gene order to make phylogenetic inferences has, at times, been disappointing because no evolutionary significant changes of gene order could be identified in some lineages [9]. There are several examples where mt gene orders were successfully used to support phylogenetic hypotheses, for instance crustaceans [10-12], echinoderms [13] and annelids [14, 15]. Nearly 80% of the rearrangements affect only tRNA genes. In the majority of these cases, only a single tRNA is affected [16]. The study of rearrangements of tRNA genes in the Hymenoptera suggests that the position of mt tRNA genes is selectively neutral [17]. Mt gene order can strongly differ within some lineages such as urochordates, molluscs, brachiopods, platyhelminths, bryozoans and nematodes [6]. The relationships of these shuffled genes phyla cannot be determined on the basis of gene order evidence and it should be noted that these phyla appear as long-branched leaves in sequence-based phylogenetic analyses [9, 18, 19], confirming that their molecular evolution rates are unusually fast.

Mt gene rearrangements can be assigned to three main models: intrachromosomal recombination [20], Tandem Duplication followed by Random Loss of genes (TDRL model [3]) and a variant of the latter which consists of tandem duplication followed by non-random loss [21]. TDRL can easily describe local transposition but inversion and long-range transposition are more consistent with the intrachromosomal recombination model [20, 22]. TDRL events mostly occur across vertebrate lineages [22] and cannot explain gene inversions and long-range transpositions, which are common in invertebrate mtDNAs [24]. In protostomes, TDRLs represent about 10% of the rearrangement events [25]. Similar

frequencies have been observed in the reconstructed rearrangements of metazoans. This may suggest that TDRL plays a marginal role (at least in invertebrates) and that recombination is an important component of the mtDNA rearrangement mechanism in metazoans [22]. There are four types of events in the intrachromosomal recombination model: inversion, transposition, reverse transposition (a transposition in which the re-inserted fragment is reversed) and gain/loss. Intrachromosomal recombination often involves the replication origins [23], but other hot spots of rearrangements have been described [26]. Consequentially, it is reasonable to consider intrachromosomal recombination events as elementary to the evolution of mtDNAs even though some transpositions may mechanistically result from TDLRs.

A variety of software tools implementing methods that automate the comparative analysis of gene order have been developed to infer phylogenies and genome evolution from mtDNAs [27, 28]. Most of these methods are based on the breakpoint number or inversion distance [29-38], and also integrate transposition events [39]. These methods are fast because they are based on approximations. Exhaustive exploration methods have rarely been exploited because they are NP-hard. The use of the web-based program CREx which considers transpositions, inversions, reverse transpositions, and TDRLs was recently proposed as one way to do so [25, 40]. Alternative approaches based on character coding for parsimony and distance analyses from genomic rearrangements have been proposed to infer phylogeny [41, 42]. Finally, a cladistic approach to code gene order data allows the reconstitution of a possible hypothetical common ancestor genome at each node of the tree [43].

Here, we present the first logical study of mtDNAs organisation in bilaterians from pairs of mt gene orders. The goal of this new approach is to reveal the evolutionary history of the mt genomic rearrangements and exhibit ancestral gene orders (ground patterns). First, we used

deuterostome mtDNAs as a study case. Second, we extended the analysis to bilaterians and emphasized the peculiar case of chaetognaths.

## Results and Discussion

Four useful definitions (3 to 6) towards the demonstration of the two properties below are given in Methods.

### Shared block property

**Proposition:** Let  $A_0$  and  $A_k$  be two genomes such that the minimal distance  $d(A_0, A_k)$  is equal to  $k$ . There exists a path  $C = (A_0, A_1, \dots, A_k)$  between  $A_0$  and  $A_k$  of minimal size (*i.e.*, of  $k$  steps) and with no cut (see Definition 6). That is to say that in  $C$ , a block of genes present in two genomes  $A_i$  and  $A_j$  (possibly inverted) is always present (possibly inverted) in all the intermediate states between  $A_i$  and  $A_j$ .

**Proof:** Let  $C = (A_0, A_1, \dots, A_k)$  be a minimal path between  $A_0$  and  $A_k$ . Let us suppose that in  $C$ , there is (at least) one cut, and that the last cut is between  $A_i$  and  $A_{i+1}$  (the blocks shared between  $A_{i+1}$  and  $A_k$  will not be cut in the path between  $A_{i+1}$  and  $A_k$ ). Let us call  $G = [G_1 \ G_2]$  the relevant block.  $G$  is cut (in  $A_i$ ) between  $G_1$  and  $G_2$ : it exists  $k'$  in  $[i+2, \dots, k]$  such that  $G_1$  and  $G_2$  are successive in  $A_i$  and in  $A_{k'}$  but not in  $A_{i+1}$  nor in  $A_{k'-1}$ .

We are in one of the following two cases:

- Case 1: the mutation  $\mu_i$  between  $A_i$  and  $A_{i+1}$  moves the block  $G_1$ . So the block  $G_2$  does not move (otherwise, the mutation  $\mu_i$  is not a cut). Note that the case " $G_2$  moves and not  $G_1$ " is symmetrical. The mutation  $\mu_i$  moves the block  $G_1$  with a block  $B$  (possibly empty), neighbour of  $G_1$ . The blocks  $B$  and  $G_1$  are successive in  $A_i$  and  $A_{i+1}$ .

We construct the path  $C' = (A'_0 = A_0, A'_1, \dots, A'_{k-1}, A'_k = A_k)$  as follows:

1) For  $j$  from 0 to  $i$ :  $A'_j = A_j$

2) For  $i \leq j < k'$ : the mutation  $\mu_j$  (in  $C$ ) moves a block  $E = [B \ G_1]$  containing the block  $G_1$

and not the block  $G_2$ . The mutation  $\mu'_j$  (in  $C'$ ) moves a block  $E'$ , obtained from  $E$  by deleting  $G_1$  (if  $E'$  is empty, it is equivalent to removing a step in the path).

3) For  $j \geq k'$ :  $\mu'_j = \mu_j$  (others mutations are unchanged)

- Case 2: the mutation  $\mu_i$  between  $A_i$  and  $A_{i+1}$  does not move the block  $G_1$  nor the block  $G_2$ . It moves a block  $B$  to the insertion point  $x$  located between  $G_1$  and  $G_2$ .

We construct the path  $C' = (A'_0 = A_0, A'_1, \dots, A'_{k-1}, A'_k = A_k)$  as follows:

1) For  $j$  from 0 to  $i$ :  $A'_j = A_j$

2) At Step  $i$ : the mutation  $\mu'_i$  moves (in  $C'$ ) the block  $B$  to point  $y$  (instead of  $x$ ), located at the "beginning" of  $G_1$  ( $G_1$  is located between  $x$  and  $y$ ), with the same sign.

3) For  $i < j < k'$ :

a- If the mutation  $\mu_j$  moves (in  $C$ ) a block  $E$  containing  $G_1$  and not  $G_2$ , then, in  $C'$ , the mutation  $\mu'_j$  moves a block  $E'$ , obtained from  $E$  by removing  $G_1$ .

b- If the mutation  $\mu_j$  moves (in  $C$ ) a block  $E$  containing  $G_2$  (with or without  $G_1$ ), then, in  $C'$ , the mutation  $\mu'_j$  moves a block  $E'$ , obtained from  $E$  by replacing  $G_2$  by  $[G_1 G_2]$ .

4) For  $j \geq k'$ ,  $\mu'_j = \mu_j$  (other mutations are unchanged).

In both cases, we obtained a path  $C'$  from  $A_0$  to  $A_k$ , not longer than  $C$ , and containing less cuts.

We get a path  $C^*$  from  $A_0$  to  $A_k$ , not longer than  $C$  and containing no cuts by iterating the process. Starting from a minimum length path proves the result.

QED

The shared block property was used in the program `genome_comparison.c` as a heuristic test to decrease the calculation time. At each step of the computation of the shortest path between a genome  $A$  and a genome  $B$ , the blocks that are shared between the current genome  $X$  and the genome  $B$  are calculated first; the only mutations that are considered to be potentially applied to the current genome  $X$  are those that do not intersect the blocks shared between  $X$  and  $B$ .

This property is reinforced by the following conjecture: let  $A$  and  $B$  be two genomes, *all* the shortest paths between  $A$  and  $B$  have no cut.

### Lower bound for minimal distance property

The property of the lower bound for minimal distance property defines a lower bound for the minimal distance between two genomes  $A$  and  $B$ , below which there is no path solution.

**Proposition:** Let  $A$  and  $B$  be two genomes at minimal distance  $k$  one from the other. We have

$$3 \times k \geq nb\_breakpoints(A, B).$$

Examples:

If  $nb\_breakpoints(A, B) = 4, 5$ , or  $6$ , then  $d(A, B) \geq 2$

If  $nb\_breakpoints(A, B) = 7, 8$ , or  $9$ , then  $d(A, B) \geq 3$

If  $nb\_breakpoints(A, B) = 10, 11$ , or  $12$ , then  $d(A, B) \geq 4$

If  $nb\_breakpoints(A, B) = 13, 14$ , or  $15$ , then  $d(A, B) \geq 5$

**Proof:** Let  $C = (A_0, A_1, \dots, A_i, A_{i+1}, \dots, A_k)$  be an arbitrary path (of length  $k$ ) between genomes  $A_0$  and  $A_k$ , and let  $\mu_i$  be the mutation between  $A_i$  and  $A_{i+1}$ . If  $\mu_i$  is a transposition or a reverse transposition, then only three intervals between two genes of  $A_i$  are modified by  $\mu_i$ . Thus at most three breakpoints of  $A_i$  are not breakpoints of  $A_{i+1}$ . If  $\mu_i$  is an inversion, then only two intervals are modified by  $\mu_i$ , and thus at most two breakpoints of  $A_i$  are not breakpoints of  $A_{i+1}$ . Thus, the number of breakpoints in  $A_0$  is at most  $3k$ .

QED

This property was used in the program `genome_comparison.c` as a heuristic test to decrease the calculation time on the basis of the following contrapositive: Let  $A$  and  $B$  two distinct genomes. Let  $k > 0$ . If  $nb\_breakpoints(A, B) > 3 \times k$ , then there is no path between  $A$  and  $B$  of length  $k$ . Indeed, for each current genome  $X$  explored in the state 0 of the automaton (progression state), the function `HEURISTIC_TEST` returns NO if  $nb\_breakpoints(X, B) >$



$3 \times$  (number of steps remaining between  $X$  and  $B$ ). In this case, the algorithm does not need to explore the search subtree from the current path, as it never leads to  $B$  with the remaining number of steps.

## Exact minimal distances and saturation threshold

Using the two previous properties as heuristics, it was possible to calculate the minimal distances between all pairs of genomes present in the taxonomic dataset (69 taxa, Table 1) considering transposition, inversion and reverse transposition. In contrast to previously published methods based on breakpoint number or inversion distance, the distance matrix obtained here is exact (S1 appendix).

**Table 1. Species, systematic position, and accession number of mitochondrial genome used for gene order comparisons.**

| Species                                              | Taxonomy                  | Accession no. |
|------------------------------------------------------|---------------------------|---------------|
| <i>Tethya actinia</i>                                | Porifera                  | AY_320033     |
| <i>Sipunculus nudus</i>                              | Sipuncula                 | FJ_422961     |
| <i>Urechis caupo</i>                                 | Echiura                   | NC_006379     |
| <i>Platynereis dumerilii</i>                         | Annelida/Polychaeta       | NC_000931     |
| <i>Phoronis architecta</i> (syn <i>psammophila</i> ) | Phoronida                 | AY368231      |
| <i>Terebratalia transversa</i>                       | Brachiopoda               | NC_003086     |
| <i>Terebratulina retusa</i>                          | Brachiopoda               | NC_000941     |
| <i>Laqueus rubellus</i>                              | Brachiopoda               | NC_002322     |
| <i>Lingula anatina</i>                               | Brachiopoda               | AB178773      |
| <i>Gyrodactylus derjavenoides</i>                    | Platyhelminthes/Trematoda | NC_010976     |
| <i>Schistosoma mansoni</i>                           | Platyhelminthes/Trematoda | NC_002545     |
| <i>Katharina tunicata</i>                            | Mollusca/Polyplacophora   | NC_001636     |
| <i>Biomphalaria glabrata</i>                         | Mollusca/Gastropoda       | NC_005439     |
| <i>Cepaea nemoralis</i>                              | Mollusca/Gastropoda       | NC_001816     |
| <i>Albinaria soerulea</i>                            | Mollusca/Gastropoda       | NC_001761     |
| <i>Nautilus macromphalus</i>                         | Mollusca/Cephalopoda      | NC_007980     |
| <i>Loligo bleekeri</i>                               | Mollusca/Cephalopoda      | NC_002507     |
| <i>Siphonodentalium lobatum</i>                      | Mollusca/Scaphopoda       | NC_005840     |
| <i>Graptacme eborea</i>                              | Mollusca/Scaphopoda       | NC_006162     |
| <i>Venerupis philippinarum</i>                       | Mollusca/Bivalvia         | NC_003354     |
| <i>Mytilus edulis</i>                                | Mollusca/Bivalvia         | NC_006161     |
| <i>Lampsilis ornata</i>                              | Mollusca/Bivalvia         | NC_005335     |
| <i>Inversidens japonensis</i>                        | Mollusca/Bivalvia         | AB055624      |
| <i>Loxocorone allax</i>                              | Entoprocta                | NC_010431     |
| <i>Flustrellidra hispida</i>                         | Bryozoa/Ectoprocta        | NC_008192     |
| <i>Watersipora subtorquata</i>                       | Bryozoa/Ectoprocta        | NC_011820     |
| <i>Bugula neritina</i>                               | Bryozoa/Ectoprocta        | NC_010197     |
| <i>Paraspadella gotoi</i>                            | Chaetognatha              | NC_006083     |
| <i>Spadella cephaloptera</i>                         | Chaetognatha              | NC_006386     |
| <i>Sagitta enflata</i>                               | Chaetognatha              | NC_013814     |
| <i>Sagitta nage</i>                                  | Chaetognatha              | NC_013810     |
| <i>Leptorhynchoides thecatus</i>                     | Rotifera/Acanthocephala   | NC_006892     |
| <i>Caenorhabditis elegans</i>                        | Nematoda                  | NC_001328     |
| <i>Trichinella spiralis</i>                          | Nematoda                  | NC_002681     |
| <i>Priapulid caudatus</i>                            | Priapulida                | NC_008557     |
| <i>Epiperipatus biolleyi</i>                         | Onychophora               | NC_009082     |
| <i>Limulus polyphemus</i>                            | Arthropoda/Xiphosura      | NC_003057     |
| <i>Stegancarus magnus</i>                            | Arthropoda/Arachnida      | NC_011574     |
| <i>Dermatophajoides pteronyssinus</i>                | Arthropoda/Arachnida      | NC_012218     |

|                                      |                           |           |
|--------------------------------------|---------------------------|-----------|
| <i>Leptotrombidium akamushi</i>      | Arthropoda/Arachnida      | NC_007601 |
| <i>Nymphon gracile</i>               | Arthropoda/Pycnogonida    | NC_008572 |
| <i>Narceus annularis</i>             | Arthropoda/Myriapoda      | NC_003343 |
| <i>Ligia oceanica</i>                | Arthropoda/Crustacea      | NC_008412 |
| <i>Argulus americanus</i>            | Arthropoda/Crustacea      | NC_005935 |
| <i>Speleonectes tulumensis</i>       | Arthropoda/Crustacea      | NC_005938 |
| <i>Tigriopus japonicus</i>           | Arthropoda/Crustacea      | NC_003979 |
| <i>Vargula hilgendorfii</i>          | Arthropoda/Crustacea      | NC_005306 |
| <i>Eriocheir sinensis</i>            | Arthropoda/Crustacea      | NC_006992 |
| <i>Megabalanus volcano</i>           | Arthropoda/Crustacea      | NC_006293 |
| <i>Cherax destructor</i>             | Arthropoda/Crustacea      | NC_011243 |
| <i>Pagurus longicarpus</i>           | Arthropoda/Crustacea      | NC_003058 |
| <i>Chinkia crosnieri</i>             | Arthropoda/Crustacea      | NC_011013 |
| <i>Balanoglossus carnosus</i>        | Enteropneusta             | NC_001887 |
| <i>Xenoturbella bocki</i>            | Xenoturbellida            | NC_008556 |
| <i>Florumetra serratissima</i>       | Echinodermata/Crinoidea   | NC_001878 |
| <i>Antedon mediterranea</i>          | Echinodermata/Crinoidea   | NC_010692 |
| <i>Gymnocrinus richeri</i>           | Echinodermata/Crinoidea   | NC_007689 |
| <i>Asterina pectinifera</i>          | Echinodermata/Asteroidea  | NC_001627 |
| <i>Ophiura lukteni</i>               | Echinodermata/Ophiuroidea | NC_005930 |
| <i>Ophiopholis aculeata</i>          | Echinodermata/Ophiuroidea | NC_005334 |
| <i>Strongylocentrotus purpuratus</i> | Echinodermata/Echinoidea  | NC_001453 |
| <i>Doliolum nationalis</i>           | Chordata/Tunicata         | NC_006627 |
| <i>Phallusia fumigata</i>            | Chordata/Tunicata         | NC_009834 |
| <i>Phallusia mammillata</i>          | Chordata/Tunicata         | NC_009833 |
| <i>Ciona savignyi</i>                | Chordata/Tunicata         | NC_004570 |
| <i>Ciona intestinalis</i>            | Chordata/Tunicata         | NC_004447 |
| <i>Halocynthia roretzi</i>           | Chordata/Tunicata         | NC_002177 |
| <i>Assymetron inferum</i>            | Chordata/Cephalochordata  | NC_009774 |
| <i>Homo sapiens</i>                  | Chordata/Craniata         | NC_012920 |

204

205 A comparison of the distances obtained by the approaches based on breakpoint or inversion  
206 and those obtained from this study showed the inaccuracy of these previous methods (Table  
207 2). At a first glance, one should expect the inversion distance and the breakpoint number to be  
208 correlated with the exact minimal distance. Comparisons of lines 1 vs 2 and lines 3 vs 4 of the  
209 Table 2 shows that the number of breakpoints between two genomes can be identical while  
210 their exact minimal distance is very different. Other cases are even more surprising: the  
211 relation between exact minimal distance and the number of breakpoints moves in the opposite  
212 direction: in several examples of mtDNA pairwise comparisons (lines 5 vs 6, 7 vs 8, 9 vs 10  
213 and 11 vs 12), the greatest number of breakpoints coincides with the shortest exact minimal  
214 distance. In several cases, the greatest inversion distances still coincide with the shortest exact  
215 minimal distances (lines 3 vs 4, 5 vs 6 and 7 vs 8). Moreover, while inversion distance gave a  
216 good estimation of the exact minimal distance in a few cases, it usually strongly  
217 overestimated the latter. For instance, in line 5 of Table 2, both distances are adequate  
218 because the exact minimal distance can be explained by 3 inversion events (1 path among 224

possible paths). Overestimation is generally significant when the possible minimal paths were mostly represented by transpositions. For instance, in line 3 of Table 2, the inversion distance is 9 while the exact minimal distance is 3.

**Table 2. Comparison of some of the breakpoint number, inversion distance, and exact minimal distance results obtained from this study.**

| Pairwise comparison of mtDNAs |                                                                       | Breakpoint number | Inversion distance | Exact minimal distance |
|-------------------------------|-----------------------------------------------------------------------|-------------------|--------------------|------------------------|
| # 1                           | <i>Argulus americanus</i> vs <i>Urechis caupo</i>                     | 11                | 10                 | 6                      |
| # 2                           | <i>Nymphon gracile</i> vs <i>Strongylocentrotus purpuratus</i>        | 11                | 8                  | 4                      |
| # 3                           | <i>Balanoglossus carnosus</i> vs <i>Strongylocentrotus purpuratus</i> | 9                 | 9                  | 3                      |
| # 4                           | <i>Nymphon gracile</i> vs <i>Loxocorone allax</i>                     | 9                 | 7                  | 5                      |
| # 5                           | <i>Eriocheir sinensis</i> vs <i>Katharina tunicata</i>                | 5                 | 3                  | 3                      |
| # 6                           | <i>Homo sapiens</i> vs <i>Strongylocentrotus purpuratus</i>           | 6                 | 6                  | 2                      |
| # 7                           | <i>Nymphon gracile</i> vs <i>Trichinella spiralis</i>                 | 8                 | 7                  | 4                      |
| # 8                           | <i>Balanoglossus carnosus</i> vs <i>Asterina pectinifera</i>          | 9                 | 8                  | 3                      |
| # 9                           | <i>Speleonectes tulumensis</i> vs <i>Leptotrombidium akamushi</i>     | 9                 | 8                  | 5                      |
| # 10                          | <i>Limulus polyphemus</i> vs <i>Asterina pectinifera</i>              | 10                | 7                  | 4                      |
| # 11                          | <i>Ligia oceanica</i> vs <i>Graptacme eborea</i>                      | 15                | 12                 | 6                      |
| # 12                          | <i>Ligia oceanica</i> vs <i>Siphonodentalium lobatum</i>              | 14                | 13                 | 7                      |

Interestingly, the minimal distances calculated between mtDNAs with a maximum of 15 genes were never greater than 8, suggesting a saturation phenomenon. To highlight a putative saturation threshold, we carried out empirical tests using the simulation described below. Three datasets of 20 different genome organisations with 15, 14 and 13 genes respectively were randomly generated. In the dataset containing mtDNA with 15 genes, the minimal distances obtained for every pairwise comparison were 6 (in 15% of all the pairwise comparisons) or 7 (85%). When doing a new simulation with random mtDNAs containing 14 genes the minimal distances obtained were 6 (50%) or 7 (50%). With random mtDNAs containing 13 genes the minimal distances obtained were 5 (5%) or 6 (95%). This shows that in the case of bilaterians (with mtDNAs containing 13, 14 or 15 protein-coding and rRNA genes) if the minimal distance is greater than 5, the probability of underestimating the true

number of mutations between two genomes is high. The characterisation of the saturation threshold allowed us to define a coefficient of saturation  $C$  for each taxon  $X$  with the following formula:

$$C(X) = \frac{|\{Y : Y = OTU \wedge D_{min}(X, Y) > 5\}|}{|\{Y : Y = OTU\}|}$$

The coefficient of saturation provided an objective criterion to remove fast-evolving taxa with a coefficient of saturation close to 100% (cut off 95%) from the taxonomic dataset. Hence, 21 of 69 taxa were excluded from the analysis: all urochordates (*Ciona intestinalis*, *Ciona savignyi*, *Doliolum nationalis*, *Halocynthia roretzi*, *Phallusia fumigata*, *Phallusia mammillata*), one copepod (*Tigriopus japonicus*), one nematode (*Caenorhabditis elegans*), all scaphopods (*Graptacme eborea*, *Siphonodentalium lobatum*), all lamellibranchs (*Inversidens japonensis*, *Lampsilis ornata*, *Mytilus edulis*, *Venerupis philippinarum*), all platyhelminths (*Gyrodactylus derjavinoidei*, *Schistosoma mansoni*), one acanthocephalan (*Leptorhynchoides thecatus*), two bryozoans (*Flustrellidra hispida*, *Watersipora subtorquata*) and two brachiopods (*Laqueus rubellus*, *Lingula anatina*).

## Reconstruction of mtDNA mutational networks: the deuterostomes as a study case

Different combinations of outgroups were assessed to explore their effects on the attachment point to the root and examine if the rooting choice would affect the optimal mtDNA mutational network(s). First, we computed mutational networks of deuterostomes rooted by *Limulus polyphemus* (Arthropoda, Ecdysozoa). Then, we performed analyses rooted with one or two additional taxa, (*Limulus polyphemus*, *Katharina tunicata* – Mollusca, Lophotrochozoa) and (*Limulus polyphemus*, *Katharina tunicata*, *Tethya actinia* – Porifera). All the computations are detailed in a logbook (S2 appendix). As the nature of the outgroup did not change the topologies of the optimal tree solutions, we decided to base the mutational networks discussed below on the solutions obtained from the computation #1 rooted on

*Limulus polyphemus*.

The computation resulted in only six distinct solutions (S3 appendix, section ‘deuterostomes\_taxA\_v2\_6sol’) in which the internal deuterostomes relationships are identical except some variations within Echinodermata. These variations include three topologies for the Crinoidea combined with two topologies for the rest of the Echinodermata (Fig 1). The two topologies obtained for the rest of Echinodermata consisted of different positioning of *Asterina pectinifera* and *Strongylocentrotus purpuratus*, of which the mtDNAs corresponded, in each solution, to Ur-echinodermata. This contradicts the conclusion drawn by Perseke et al. [44] who proposed that the mtDNA ground pattern of the Ophiuroidea, Crinoidea, and the group of Echinoidea, Holothuroidea, and Asteroidea could be derived from a hypothetical ancestral crinoid gene order.

In an attempt to further explore the mutational network of extant echinoderms, reduce the number of solutions, and specify the mtDNA organisation of Ur-echinodermata, we used three additional and alternative PPHs defined from the most recent literature on Echinodermata:

- PPH#30a (Echinoidea+Asteroidea) [44]. In this first hypothesis, the Asteroidea are placed as a sister group to the clade Echinoidea + Holothuroidea
- PPH#30b (Ophiuroidea + Echinoidea): Cryptosyringid [45]. In this second hypothesis, the Ophiuroidea are placed as a sister group to the clade Echinoidea + Holothuroidea
- PPH#30c (Asteroidea + Ophiuroidea): Asterozoa [46]. In this third hypothesis, the Asteroidea are placed as a sister group to Ophiuroidea.

When tree reconstructions were constrained with PPH#30a or PPH#30b we still found three topologies corresponding to three different relationships within Crinoidea, but *Asterina pectinifera* always appeared as Ur-echinodermata (Fig 1B), whatever the PPH considered. Only with PPH#30c, computations show that either *Asterina pectinifera* or *Strongylocentrotus*

*purpuratus* represents Ur-echinodermata in distinct but equiparsimonious scenarios (Fig 1). Previous analyses based on mt gene order have suggested that the ancestral mt genome of echinoderms most likely resembles the echinoid mtDNA [13, 47]. However, a logical approach showed that either Echinoidea or Asteroidea might represent the echinoderm ground pattern.

Three topologies exhibited different relationships within Crinoidea, specifically between *Antedon mediterranea* and *Gymnocrinus richeri* with *Florometra serratissima* basal to Crinoidea (S3 appendix, section ‘deuterostomes\_taxA\_v2\_6sol’). For a local analysis of the mutational network within Crinoidea, tRNA genes have been included for computations. There are up to 22 tRNA genes added to the 15 protein-coding and rRNA genes. Therefore, including the tRNAs into the path calculation between two genomes increases the computation time to a point that makes the procedure unfeasible, unless the genomes compared are very close. For example, the path calculation between *Florometra serratissima* and *Antedon mediterranea* is fast, as the minimal distance is 3. However, between *Asterina pectinifera* and *Homo sapiens*, the minimal distance is at least 11, whereas it is only 2 when considering only protein-coding genes. When *Asterina pectinifera* or *Strongylocentrotus purpuratus* are used as outgroups, the analysis that included the tRNA genes yielded a single unique topology for the Crinoidea (S3 appendix, sections ‘with\_tRNA\_crinoids\_taxA\_1sol’ and ‘with\_tRNA\_crinoids\_taxB\_1sol’), as represented in Fig 1.

Finally we performed computations regarding several phylogenetic hypotheses on *Xenoturbella bocki* relationships. Acoelomorph flatworms related to *Xenoturbella bocki* were initially placed within deuterostomes [48] but several conflicting hypotheses are still under debate. A first study based on the analysis of newly sequenced mtDNAs [49] provided no support for a sister group relationship between Xenoturbellida and Acoela or Acoelomorpha and suggested an unstable phylogenetic position of *Xenoturbella bocki* as sister group to or

part of the deuterostomes. More recently, two phylogenomic analyses have grouped *Xenoturbella* with acoelomorphs (=Xenacoelomorpha) and suggested that Xenacoelomorpha could be the sister group of Nephrozoa [50, 51] or Protostomia [50]. In our contribution, whatever the PPH used to constrain the position of *Xenoturbella bocki* (i.e., whether it is sister group to or part of the deuterostomes), its mtDNA organisation is always derived from an ancestor exhibiting an mtDNA organisation identical to *Homo sapiens* (S3 appendix). Hence our results corroborate the conclusion that the arrangement of protein-coding and rRNA genes in the mtDNA of *Xenoturbella bocki* is plesiomorphic [52] and therefore does not contain relevant signal to assess the phylogenetic relationships of this species.

As a result of using PPHs to constrain the relationships within echinoderms and tRNA genes to decipher Crinoidea relationships, only two mutational networks were finally validated for deuterostomes (Fig 1). The major advantage of a complete approach is that all the values of HTUs (inferred ancestral mtDNA organisations) that are by definition not present in the taxonomic dataset are enumerated. Such a comprehensive and correct enumeration is not possible in traditional probabilistic approaches or by manual inspection of pairwise scenarios. In the case of the deuterostomes, calculating the mtDNA mutational network required the insertion of only two HTUs, the first in the lineage leading to cephalochordates and the second in the one leading to the echinoderms (Fig 1). Each HTU has two possible values because of the commutative property of both paths described. For each path, the HTUs represent a ground pattern that characterizes an ancestor or a current mtDNA that has not been sequenced yet. Interestingly, the mt gene orders of HTU#2a and HTU#3a that stand for two distinct paths between Craniata and Echinodermata have already been characterised in a previous study and were considered as the echinoderm consensus [47].

To summarise, below are listed the key results from this first analysis, results that could also be described as logical consequences of the problem PHYLO:



- Monophyly of Chordata, monophyly of Echinodermata, monophyly of Ophiurida and monophyly of Crinoidea are always verified.
- There is only one subtree for Cephalochordata with *Homo sapiens* mtDNA as Ur-cephalochordate.
- There is only one subtree for Ophiuroidea with *Ophiobolis aculeata* mtDNA as Ur-ophiuroidea.
- There is only one position for Hemichordata and *Xenoturbella bocki*.
- There is only one subtree for Crinoidea (when using tRNA genes) and *Florometra serratissima* mtDNA represents Ur-crinoidea.
- *Homo sapiens* mtDNA represents Ur-deuterostomia, Ur-chordata, Ur-cephalochordata and Ur-ambulacria.

#### **The use of tRNA genes to solve the PHYLO problem**

tRNA genes are usually omitted in the comparison of mt gene arrangements because of their accelerated moving rate. However, as shown above, tRNA genes do contain phylogenetic information in some contexts and should be considered in rearrangement models to limit the number of tree solutions. The computation of the Echinodermata mutational network with all mt genes was possible but could not be held with completeness. The reconstruction of one tree solution with all mt genes with *Asterina pectinifera* as Ur-echinodermata (S3 appendix, sections ‘with\_tRNA\_eleutherozoa\_taxA\_2sol’ and ‘with\_tRNA\_ophiurida\_taxA\_1sol’) required 25 evolutionary steps and was tractable (Fig 2A). This topology was slightly different (different branching within Ophiuroidea) from the topology obtained with the protein-coding and rRNA genes on which specific mutations of tRNA genes have been added *a posteriori* (Fig 2B). The ancestral state of Ophiuroidea has been shown to be difficult to infer and remains unresolved [53, 54] but it has been suggested that *Ophiura lutkeni* has a more derived mt gene order than *Ophiobolis aculeata* [53]. While the scenarios computed



with protein-coding and rRNA genes always favoured *Ophiobolis aculeata* mt gene order as the Ophiuroidea ground pattern (Fig 1), the topology obtained with the inclusion of tRNA genes proposed 6 distinct hypothetical ground patterns (Fig 2A) with a more derived position for *Ophiobolis aculeata* than *Ophiura lutkeni*. Moreover, a TDRL event has been proposed in the path between Echinoidea and Holothuroidea [54, 55]. In the present work, all the 14,641 possible path of length five between *S. purpuratus* and *C. miniata* are represented by a succession of five tRNA transpositions (Fig 2).

The computation including all mt genes (Fig 2A) raised interesting remarks. In the mutational network computed with all mt genes, the total number of permutations was minimal and represented the most parsimonious scenario (25 permutations on Fig 2A instead of 26 on Fig 2B obtained from a computation with coding-protein and rRNA genes only). However the total number of evolutionary steps concerning the protein-coding genes increased (Fig 2A, always more than 6 permutations) when compared with the least parsimonious scenario computed without tRNA genes (Fig 2B, 6 permutations). Parsimony is the principle according to which, all other things being equal, the best hypothesis to consider is the one that requires the fewest evolutionary changes. However, the reasonableness of the parsimony rule in a given context may have nothing to do with its reasonableness in another one. In other words, when using the parsimony principle to decipher evolutionary hypotheses, the outcome depends on the set of characters considered. Indeed, when we look at the history of a given mtDNA, nearly 80% of all the permutations that have happened involve tRNA genes. Given this high percentage, if we want to minimize the global number of permutations (*i.e.*, if we are looking for parsimonious trees that takes all gene into account), the influence of larger protein-coding and rRNA genes is negligible when compared to the one of smaller tRNA genes. Hence, the mutational networks obtained only with the larger genes are expected to be significantly different than those obtained with all the genes (which should be very similar to

the parsimonious trees obtained when using only tRNA genes). This suggests that even if the use of tRNA genes can be relevant in certain cases for local resolutions, it is reasonable to rely predominantly on the larger genes with a lower evolutionary rate, when calculating the tree solutions corresponding to deep and ancient nodes/lineages like in the case of deuterostomes or bilaterians.

### **Towards the mtDNA mutational network of bilaterians with a logical approach**

There were too many OTUs (47 bilaterians + 1 poriferan) to make a single global computation, but smaller computations that verify the convergence of results at each step were tractable.

Using known monophyletic groups (see Methods and S9 appendix), calculations were carried out on taxonomic groups and subgroups by recombining the resulting solutions in the hierarchical structure of the Bilateria phylogeny. The chronological description of all the computations is given in S2 appendix. A high number of equiparsimonious topologies were obtained. Even though a unique representation of these topologies is not possible, the whole set of solutions can be enumerated (S3-S6 appendix). The solution files make up a database of all the possible solutions. Moreover, as described in the example above with the echinoderms, the number of possible solutions can be reduced, possibly down to a single one, by adding PPHs to the calculation.

In the case of Ecdysozoa, seven calculations had to be carried out to obtain a complete mutational network (S4 appendix). After the recombination of these calculations, 4212 equiparsimonious solution trees were obtained corresponding to 3 subtrees for Decapoda combining with 39 subtrees for the rest of Mandibulata, ( $3 \times 39 = 117$  subtrees for all Mandibulata), 9 subtrees for Chelicerata (comprising 6 subtrees for Acari, meaning  $117 \times 9 = 1053$  subtrees for Arthropoda), 1 subtree for Onychophora ( $1 \times 1053 = 1053$  subtrees for Panarthropoda), 4 subtrees for Introverta ( $4 \times 1053 = 4212$  trees for Ecdysozoa).

Concerning Lophotrochozoa, 12 calculations were needed, leading to 81 solution trees (S5 appendix): 3 subtrees for Gasteropoda combining with 1 subtree for the rest of Mollusca ( $1 \times 3 = 3$  subtrees for Mollusca), 3 subtrees for the rest of Eutrochozoa, ( $3 \times 3 = 9$  for Eutrochozoa), 9 subtrees for Lophophorata ( $9 \times 9 = 81$  subtrees for Lophotrochozoa).

The large amount of equiparsimonious solution trees obtained for the two main protostomian clades does not allow a single representation. Nevertheless, the analyses provided several logical consequences that are important results from a biological perspective:

- Monophyly of Acari, monophyly of Panarthropoda, and monophyly of Annelida are always verified.
- *Limulus polyphemus* mtDNA represents Ur-panarthropoda, Ur-arthropoda, Ur-mandibulata and Ur-chelicerata.
- There is only one solution for the set of mutations which links the mtDNA of Ur-panarthropoda (*Limulus polyphemus*) and the mtDNA of *Eriocheir sinensis* (transposition), *Narceus annularis* (transposition) and *Epiperipatus biolleyi* (6 possible paths, each with 3 mutations).
- Three solutions have been found for Ur-ecdysozoa which correspond either to the mtDNA of *Limulus polyphemus* or to *Priapululus caudatus* or to a hypothetical ancestor (HTU#1).
- There is only one solution for the cephalopod clade, with *Katharina tunicata* mtDNA as Ur-cephalopods linking *Nautilus macrocephalus* mtDNA (transposition) and *Loligo bleekeri* mtDNA (4 possible paths, each with 2 mutations).
- *Cepaea nemoralis* represents Ur-gasteropoda.
- There is only one solution for the position of *Loxocorone allax* mtDNA (10 possible paths, each with 2 mutations) and *Phoronis architecta* mtDNA (one transposition) with respect to *Katharina tunicata*.

- *Sipunculus nudus* (Sipunculida) is always the sister group of all the annelid species (*Platynereis dumerilii* and *Urechis caupo*).

- *Katharina tunicata* mtDNA represents Ur-lophotrochozoa, Ur-eutrochozoa, Ur-mollusca, Ur-lophophorata and Ur-cephalopoda.

To give more insight into the deep branching of bilaterians, we carried out a computation rooted on *Tethya actinia* and using the respective gene order ground patterns of protein-coding and rRNA genes of ecdysozoans (*Limulus polyphemus*, *Priapulus caudatus* or HTU#1), lophotrochozoans (*Katharina tunicata*) and deuterostomes (*Homo sapiens*) as the representative of the three main bilaterian clades. This strategy allowed enumerating with completeness 6 mutational networks for Bilateria (Fig 3, Table 3) and to highlight the following logical consequence: *Homo sapiens* mtDNA represents Ur-bilateria.

**Table 3. Organisation of mitochondrial protein-coding and ribosomal RNA genes of hypothetical ancestral mitochondrial genomes (HTUs) represented on Fig 3.**

| HTU #      | Hypothetical genomic organizations                                                 |
|------------|------------------------------------------------------------------------------------|
| 1, 3, 5, 7 | cox1 cox2 atp8 atp6 cox3 nad3 -nad5 -nad4 -nad4L nad6 cob rrnS rrnL nad1 nad2      |
| 2          | cox1 cox2 atp8 atp6 -nad5 -nad4 -nad4L nad6 cob rrnS rrnL nad1 cox3 nad3 nad2      |
| 2          | cox1 cox2 atp8 atp6 -nad5 -nad4 -nad4L nad6 cob -nad3 -cox3 rrnS rrnL nad1 nad2    |
| 2          | cox1 cox2 atp8 atp6 nad6 cob nad4L nad4 nad5 -nad3 -cox3 rrnS rrnL nad1 nad2       |
| 2, 4, 6    | cox1 cox2 atp8 atp6 cox3 nad3 -nad5 -nad4 -nad4L -cob -nad6 -nad1 -rrnL -rrnS nad2 |
| 3          | cox1 cox2 atp8 atp6 cox3 nad3 nad4L nad4 nad5 -nad6 cob -nad1 -rrnL -rrnS nad2     |
| 4, 8       | cox1 cox2 atp8 atp6 -nad5 -nad4 -nad4L nad6 cob -nad1 -rrnL -rrnS cox3 nad3 nad2   |
| 5          | cox1 cox2 atp8 atp6 cox3 nad3 -nad5 -nad4 -nad4L -cob nad6 rrnS rrnL nad1 nad2     |
| 7          | cox1 cox2 atp8 atp6 cox3 nad3 rrnS rrnL nad1 -cob nad6 -nad5 -nad4 -nad4L nad2     |
| 8          | cox1 cox2 atp8 atp6 cox3 nad3 rrnS rrnL nad1 nad6 cob nad4L nad4 nad5 nad2         |

Mt gene arrangements and ground patterns in Bilateria have been previously studied in Lophotrochozoa [28, 56], Ecdysozoa [57] and Deuterostomia [52]. It is important to note that these studies usually considered all the mt genes to draw their conclusions, which could

explain some incongruence with the present results. Notably, it has been suggested that the ancestral mt gene order in Lophotrochozoa and Deuterostomia cannot be found in extant species but rather represent consensus between ingroup and outgroup arrangements [28]. Considering the protein-coding and rRNA genes, we showed that the ground patterns of Deuterostomia and Lophotrochozoa are realized in the respective mt gene arrangements of two extant species, *Homo sapiens* and *Katharina tunicata*. In Ecdysozoa, Ur-arthropoda is always realized in the gene arrangement of *Limulus polyphemus* like it has been previously proposed [58]. In addition, the mt gene order of *Limulus polyphemus* should also be considered as the ground pattern of Panarthropoda and Ecdysozoa but our results also demonstrated that Ur-ecdysozoa could also correspond to the mitochondrial genome of *Priapulius caudatus* or in an inferred ancestral mtDNA organisation that is not realized in extant species. Priapulids have been described as an ancient clade and seem likely to adhere closely to the predicted ecdysozoan ground pattern [57]. Finally, the ground pattern of Bilateria was previously hypothesised [59]. The arrangement of the protein-coding and rRNA mt genes of *Homo sapiens* has been considered as Ur-bilateria. It has been also suggested that the differences previously observed between vertebrate and arthropod genomes are due mainly to gene rearrangements within the protostome lineages, a conclusion corroborated by our study.

Additional computations rooted on *Tethya actinia* were carried out with four chaetognath mtDNAs added to the dataset described above (S7-S8 appendix). The position of chaetognaths was either basal to protostomes, ecdysozoans, or lophotrochozoans (34 possible topologies, S7-S8 appendix) and three logical consequences were emphasised:

- Chaetognatha mtDNAs were always grouped together (monophyly of Chaetognatha is always verified).

- Among the chaetognaths, the Sagittidae family is valid with *Flaccisagitta enflata* mtDNA as Ur-sagittidae.

- Chaetognatha mtDNAs cannot be basal to all bilaterians (the mtDNA organisation of chaetognaths never derived directly from that of *Homo sapiens*).

Although it was possible to assert that chaetognaths were not the sister group of bilaterians, the different topologies obtained are another reminder that the phylogenetic position of Chaetognatha is still one of the most problematic issues of metazoan phylogeny [60].

## Conclusions

We hope that this pilot work will inspire further use of formal logic for evolutionary studies based on gene order data. It has the benefit of both correctness and completeness: in our study, the tree solutions obtained for each computation encompass all the mutational networks that verify properties P1 to P6. It is impossible to explore all the entire possible solutions by manual inspection when the path length is more than one step. Such an approach is non-exhaustive and therefore useless. At first, the exploration of all the possible mutational networks might not seem to be a very elegant method, as it can offer numerous solutions to the same problem. However, an understanding of the logical consequences (true for all solutions found) can only be obtained through a complete enumeration and these logical consequences are, in themselves, extremely robust results. In our study of the bilaterian mtDNAs, we have decided to use the broadest and most indisputable PPHs, which lead us to all the possible mutational networks and, indeed, to a high number of equiparsimonious trees. By adding more PPHs for higher-level bilaterian taxa, we have significantly reduced the number of solutions depending on the supplementary hypotheses selected. Such a hypothetico-deductive approach was particularly fruitful in the study case of deuterostomes and should be applied to many other clades of bilaterians.

## Methods

### Problematic

The dataset is represented by a taxonomic sample of  $N$  metazoans for which the mtDNA is known and a set of possible elementary mutations to switch between one mtDNA to another.

It is possible to encode the organisation of a given mtDNA by a linear representation that satisfies the following properties:

- the last gene in the list precedes the first one (mtDNA circularity);
- when the sign of *cox1* is positive (positive strand), the gene list is read from left to right;
- when the sign of *cox1* is negative (negative strand) the gene list is read in the reverse direction and the signs of all the other genes are inverted.

From a linear representation and, if necessary, by reversing the reading direction and the sign of genes it is possible to define a Canonical Linear Representation (CLR) for all mtDNAs with the following properties:

- the first gene is *cox1* (by convention);
- the sign of *cox1* is positive and genes are read from left to right.

For instance the CLR of *Homo sapiens* mtDNA with thirteen protein-coding and two ribosomal RNA (rRNA) genes is given by:

[ *cox1 cox2 atp8 atp6 cox3 nad3 nad4L nad4 nad5 -nad6 cob rrnS rrnL nad1 nad2* ]

#### - Definition 1: successive genes

Let  $A$  be a genome and  $g_1$  and  $g_2$  be two genes in  $A$ . We can say that  $g_1$  and  $g_2$  are successive in  $A$  if  $g_2$  follows  $g_1$  in the CLR of  $A$  or if  $g_1$  is the last gene in the CLR of  $A$  and  $g_2$  the first gene in the CLR of  $A$  ( $g_2$  being *cox1*).

#### - Definition 2: block of genes

Let  $A$  be a genome. A block of genes is a sequence of successive genes  $[g_1 g_2 \dots g_r]$  in  $A$  ( $g_i$

and  $g_{i+1}$  are successive in  $A$ ).

The set of five possible elementary permutations consists of:

- transposition: a gene or a block of genes (named "selected block") separates from the genome and is re-inserted between two genes at a different position (named "insertion point").
- inversion: a gene or a block of genes separates from the genome and is re-inserted in the opposite direction at the same position. When a block of genes reverses, the gene order within the block is reversed as well as the sign of each gene.
- reverse transposition: a transposition in which the re-inserted gene or block of genes is reversed;
- loss: a gene or a block of genes separates from the genome and disappears;
- gain: a novel gene or a block of genes is inserted in the genome.

Solving the PHYLO problem with completeness consists of enumerating all the equiparsimonious trees that explain the paths between distinct mtDNAs with the minimal number of genomic events. In order to calculate these trees, the reconstruction method is organised along three main procedures. First, a pairwise genome comparison program calculates the minimal paths between all mtDNAs encoded in a minimal distance matrix. Second, a complete finite model generator for first-order logic calculates all the most parsimonious trees that respect the minimal distance matrix and clades defined by Primary Phylogenetic Hypotheses (hereinafter PPHs). Third, ancestral mt gene arrangements (or Hypothetical Taxonomic Units, hereinafter HTUs) are defined at all internal nodes. For this study, 29 PPHs were used (S9 appendix). They all are well-admitted hypotheses associated to well-known taxa. Our results showed that 8 among these PPHs were logical consequences, *i.e.*, they were always verified even not previously imposed (see Results and Discussion). Consequentially, only the 21 PPHs imposing the monophyly of the following taxa were necessary for the study: Bilateria, Deuterostomia, Ambulacria, Eleutherozoa,



Ecdysozoa, Arthropoda, Mandibulata, Crustacea, Decapoda, Chelicerata, Introverta,  
Lophotrochozoa, Mollusca, Polyplacophora, Cephalopoda, Gasteropoda, Eutrochozoa,  
Polychaeta, Echiura, Lophophorata, and Brachiopoda.

# **Step 1 - Genome comparison algorithm**

Let  $A$  and  $B$  be two mtDNAs. The calculation of all possible paths in  $k$  steps to move from  $A$  to  $B$  by successive elementary mutations is an NP-hard problem. We wrote a program `genome_comparison.c` (source code available upon request) that, through a depth first exploration of a search tree, enumerates all the possible paths of length  $k$  starting from  $A$ . Each path of length  $k$  leading to  $B$  is a solution while any other path (not ending to  $B$ ) is a deadlock which causes backtracking in the search tree and exploration of another branch (this is the backtracking algorithm, see [61]). The backtracking algorithm to find a path from  $A$  to  $B$  in  $k$  steps is given below.

---

Backtracking algorithm: calculation of all the paths between  $A$  and  $B$  mtDNAs in  $k$  steps

---

## **Main variables**

```
state    // current state of the automaton
GL       // data structure encoding the current path and associated problem
          // GL includes the path from  $A$  to a current genome  $X$  in  $r$  steps
          // the associated problem is the search of the paths from  $X$  to  $B$  in  $(k-r)$  steps
begin
  initialisations          // reading and encoding of genomes  $A$  and  $B$ 
                          // initialisation of  $GL$  with a path of length 0
  number_of_solutions  $\leftarrow$  0
  state  $\leftarrow$  0          // progression state (initial state)
  finished  $\leftarrow$  false
  while (finished = false)
  do    case (state) of
```

```

574      0:      // progression state
575
576      if (the search tree has been totally explored)
577
578      then    state ← 1      // final state - the search tree has been totally explored
579
580      else    APPLY A HEURISTIC TEST to the current associated problem (encoded by GL)
581
582      if (the heuristic test returns "YES") // GL is a solution
583
584      then    state ← 2      // success state - a solution has been found
585
586      else    if (the heuristic test returns "INDETERMINATE")
587
588      then    calculate next possible mutation  $M$  to apply to  $X$ 
589
590      calculate  $X' = M(X)$ 
591
592      extend GL with the last step from  $X$  to  $X'$ 
593
594      // GL = new current path (and associated problem)
595
596      state ← 0      // progression state
597
598      else // the heuristic test returns "NO":
599
600      // GL is not a solution, and cannot lead to a solution
601
602      state ← 3      // backtrack state
603
604      1:      // final state - the search tree has been totally explored
605
606      finished ← true
607
608      if (number_of_solutions = 0)
609
610      then    print "no solution"
611
612      else    print "no other solutions"
613
614      2:      // success state - a solution has been found
615
616      print the solution
617
618      number_of_solutions ← number_of_solutions + 1
619
620      if (want_all_solutions = true)
621
622      then    state ← 3      // backtrack state
623
624      else    finished ← true
625
626      3:      // backtrack state - backtracking in the search tree
627
628      remove the last step of GL
629
630      state ← 0      // progression state

```

end

---

In state 0 (progression state), we apply a heuristic test as a function that returns:

- YES, if the path encoded in  $GL$  is a solution, *i.e.*, a path from  $A$  to  $B$  in  $k$  steps. In this case, the solution is displayed (state 2).
- NO, if the path encoded in  $GL$  is not a solution and cannot be extended to construct a solution. In this case, the algorithm backtracks (state 3) and does not need to explore the search subtree from the current path  $GL$  because it cannot lead to a solution. This reduces the computation time.
- INDETERMINATE, otherwise. In this case, the algorithm extends the current path  $GL$  by listing all the possible mutations it can apply to the current genome  $X$ .

To calculate the next mutation to be applied to the current genome  $X$ , all possible mutations must be enumerated: transposition, reverse transposition, inversion and gain/loss. But it is possible to improve the program by not considering the gain/loss events and calculating the paths between two mtDNAs reduced to their common genes (with the same number of genes) only using transposition, reverse transposition and inversion. Then, and still with completeness, the model generator calculates the tree solutions that fit with the minimal distances. Because in the considered dataset, gain/loss events are rare and obvious, the solutions trees are determined discarding these events which are inserted *a posteriori*.

Due to genome circularity, there are always three distinct transpositions leading to a single gene order (Fig 4). Therefore, the program arbitrarily chooses one of these three possibilities when it enumerates transpositions.

Because of the exponential complexity of the backtracking algorithm, the associated computation time can be very long for paths with numerous rearrangement steps. This time can however be dramatically reduced when using two demonstrated mathematical properties

as heuristic tests, the shared blocks property and the lower bound for minimal distances property (see Results and Discussion). Here, we present four useful definitions towards the mathematical proof of the two properties cited above:

**- Definition 3: breakpoint**

Let  $A$  and  $B$  be two genomes having exactly the same genes. Let  $g_1$  and  $g_2$  be successive genes in  $A$ . The position (in  $A$ ) between  $g_1$  and  $g_2$  is called a breakpoint between  $A$  and  $B$  if neither  $g_1$  and  $g_2$  nor  $-g_1$  and  $-g_2$  are successive in  $B$ . The number of breakpoints between  $A$  and  $B$  is denoted by  $nb\_breakpoints(A, B)$ .

**- Definition 4: shared block**

Let  $A$  and  $B$  be two genomes having exactly the same genes. A block shared between  $A$  and  $B$  is a block of genes containing no breakpoint. Equivalently, a block shared between  $A$  and  $B$  is a block of genes that appears in both  $A$  and  $B$  (possibly in a reversed order)

**- Definition 5: maximum shared block**

Let  $A$  and  $B$  be two genomes having exactly the same genes. A maximum shared block between  $A$  and  $B$  is a shared block that is delimited by two breakpoints.

**- Definition 6: cut**

Let  $C = (A_0, A_1, \dots, A_k)$  be a  $k$ -path from genome  $A_0$  to genome  $A_k$ . Given an elementary mutation  $\mu_i$  (transposition, inversion, reverse transposition) that transforms  $A_i$  into  $A_{i+1}$ ,  $\mu_i$  is called a cut if two blocks  $G_1$  and  $G_2$  exist and are successive in  $A_i$  and  $A_j$  ( $j > i+1$ ) but not in  $A_{i+1}$ . In other words,  $[G_1 G_2]$  is a block shared between  $A_i$  and  $A_j$ , but is intersected in  $A_i$  by the mutation  $\mu_i$ .

**Step 2 - Tree computation**

Logic allows studying a problem with a hypothetico-deductive approach, permitting the enumeration of all the solutions of the problem under study, to then assess working

hypotheses or answer specific questions, all with the same program (Genesereth and Nilsson, 1988) [62]. A finite model generator is a program that computes all the solutions of a set of first-order logical formulas representing the problem. Several model generators exist [63], and their common characteristics are correctness (the solutions are correct), completeness (all the solutions are listed), and decidability (all computations end, an obvious property for finite domains). PHYLO can be axiomatised by writing a set of first order logic formulas that defines a connected and acyclic graph (tree or dendrogram) representing the network of the minimum number of mutations between all the distinct mtDNAs of a given taxonomic dataset. In this graph, each vertex (node) of the tree represents an mtDNA, while each edge represents a mutation between two linked nodes.

To write this set of logical formulas (see axioms in S3-S7 appendix), one can use a relation  $R(x, y)$  which represents by convention the existence of an edge between the nodes  $x$  and  $y$  in the graph, and each instance of the relation  $R(x, y)$  being true or false. In other words,  $R(x, y)$  is true when there is an edge between  $x$  and  $y$ . The set of all possible values of the arguments of the relation  $R$  is called the domain (this is the set of all the nodes of the graph).

Finally, the solutions of PHYLO are the most parsimonious graphs  $G$  (*i.e.*, defined on the smallest possible domain containing at least all the taxonomic dataset) which satisfy the following axioms:

**Property P1** -  $G$  is simple (the relation  $R$  is not reflexive, *i.e.*,  $R(x, x)$  is false).

**Property P2** -  $G$  is non-oriented ( $R$  is symmetrical).

**Property P3** -  $G$  is connected and acyclic ( $G$  is a tree)

**Property P4** -  $G$  respects the minimal distance matrix: for each pair of genome  $x$  and  $y$  belonging to the taxonomic dataset, the path length between the nodes  $x$  and  $y$  in  $G$  is always greater than or equal to the minimal distance between  $x$  and  $y$ .

**Property P5** -  $G$  verifies additional constraints (PPHs), conditional on choosing a root node to define the hierarchical levels in the tree. In other words, the PPH imposes the existence of given monophyletic groups.

**Property P6** - It is possible to calculate all the possible mtDNA organisations for each HTU in  $G$  (the ancestral states that are not represented in the dataset).

The model generator computes all the solutions that satisfy the properties P1 to P5 considered as axioms of PHYLO. Property P6 is verified *a posteriori* for each solution.

In a model generator, it is possible to add extra-logical constraints to the set of formulas.

These are defined an algorithmic process called constraint programming [64]. In practice, a constraint can replace a group of logical formulas having the same meaning. This can improve performance by replacing as a large subset of logical formulas maybe replaced by an equivalent constraint that is checked more easily and speedily. This feature is supported by the Davis and Putman model generator [65, 66]. At each step, the program checks if the current interpretation satisfies the constraints or not. If the constraints are not satisfied, the current interpretation is rejected and there is backtracking. For instance, the property P3 (the graph is connected and acyclic) can be easily verified for each current interpretation by a constraint that verifies that, for each connected components of the current graph, the number of nodes equals the number of edges plus 1. Similarly, the properties P4 and P5 are preferably expressed in the form of constraints rather than sets of logical formulas.

In the present work, we used an experimental model generator belonging to the Davis and Putnam type with symmetry breaking techniques [67, 68]. This model generator is correct, complete, and decidable and supports constraints. Any model generator with similar characteristics may also be suitable to solve PHYLO.

### Step 3 - Calculating the hypothetical common ancestors (verifying P6)

After step 2, the analysis of each tree solution enables determination of ancestral states (also called ground patterns). In each tree solution with  $V$  nodes, there are  $N$  nodes ( $N < V$ ) representing the  $N$  genomes belonging to the taxonomic dataset (Operational Taxonomic Units, OTUs), and  $M$  additional nodes that represent ancestral states (HTUs):  $V = N + M$ . Determining ancestral states consists in enumerating all possible values for the  $M$  HTUs of the tree solution (and thus proving that the tree solution verifies property P6), or on the contrary in proving that there is at least one HTU in the tree solution for which no value can be found (in this case the tree solution does not verify property P6, and therefore is not valid). To enumerate all the possible values of the  $M$  HTUs, all the paths of length  $k$  linking two OTUs  $A$  and  $B$  must be recalculated such that the path between  $A$  and  $B$  in the tree solution is of length  $k$  and passes only through HTUs (the program "genome\_comparison.c" enumerates all the paths). It appears that two cases are possible for each HTU  $X$ :

1. A unique pair  $(A, B)$  of OTUs is such that  $X$  appears in the recalculated paths between  $A$  and  $B$ . In this case, all possible values for  $X$  appear in the paths between  $A$  and  $B$  at the position corresponding to  $X$ .
2. Several pairs of OTUs are such that  $X$  appears as an intermediate step in the recalculated paths. In this case, it is necessary to find the common values for  $X$ . This could be done using a simple text editor by searching for common mtDNAs in the files containing all possible paths, but to perform this operation we used a string comparison program available upon request. A lack of common values for  $X$  means that the tree solution is not a valid solution: it does not verify P6 because it contains a minimal subtree that does not verify P6. Any other solution containing this minimal subtree is similarly not valid.

## **Step 4 - Determining the complete set of tree solutions**

For each invalid minimal subtree  $A$ , an additional constraint is programmed into the model generator to rule out the solutions containing  $A$ . Tree solutions are recalculated (step 2) and verified (step 3), possibly leading to the discovery of other invalid minimal subtrees and thus to the addition of new constraints to recalculate the solutions (feedback mechanism). The complete set of optimal solutions is determined by iterating this process and eliminating all the solutions that do not verify P6.

A result verified by all the enumerated solutions is called a logical consequence. In contrast to all existing methods used to analyse the evolution of the mt gene order that only provide incomplete results, a complete logical approach will enumerate all the solutions and highlight the logical consequences.

In practice, calculating tree solutions is possible only for a small taxonomic dataset (model generation is NP-hard). But it is possible to analyse a broader taxonomic dataset by combining all the optimal solutions of smaller subdatasets (local analysis). In the present study, the tree solutions for the entire group of bilaterians group have been calculated thanks to the combination of 36 computations (see S3-S7 appendix). All the computations were done on a laptop with a 2.5 GHz processor.

## **Acknowledgments**

We wish to thank Claudine Chaouiya, Gabriel Nève and Daniel Papillon for helpful discussions and corrections of the manuscript.

## **Author Contributions**

Conceived and designed the study: LO and YP. Programming: LO. Mathematical proofs: PP. Wrote the paper: LO, PP, YP. All authors have seen and approved the manuscript



## References

1. Boore JL. Animal mitochondrial genomes. *Nucleic Acids Res.* 1999; Apr 15;27(8):1767–80. Review.
2. Sankoff D, Leduc G, Antoine N, Paquin B, Lang BF, Cedergren R. Gene order comparisons for phylogenetic inference: evolution of the mitochondrial genome. *Proc Natl Acad Sci U S A.* 1992; Jul 15;89(14):6575–9.
3. Moritz C, Dowling TE, Brown WM. Evolution of animal mitochondrial DNA: relevance for population biology and systematics. *Annual Rev Ecol Syst.* 1987; 18:269–292.
4. Boore JL, Brown WM. Big trees from little genomes: mitochondrial gene order as a phylogenetic tool. *Curr Opin Genet Dev.* 1998; Dec;8(6):668–74. Review.
5. Lang BF, Gray MW, Burger G. Mitochondrial genome evolution and the origin of eukaryotes. *Annu Rev Genet.* 1999; 33:351–97. Review.
6. Podsiadlowski L, Mwinyi A, Lesný P, Bartolomaeus T. Mitochondrial gene order in Metazoa – theme and variations. In: Wägele JW, Bartolomaeus T, editors. *Deep Metazoan Phylogeny: the backbone of the tree of life.* Berlin: Walter De Gruyter GmbH; 2014. pp. 459–472.
7. Boore JL, Collins TM, Stanton D, Daehler LL, Brown WM. Deducing the pattern of arthropod phylogeny from mitochondrial DNA rearrangements. *Nature.* 1995; Jul 13;376(6536):163–5.
8. Rokas A, Holland PW. Rare genomic changes as a tool for phylogenetics. *Trends Ecol Evol.* 2000; Nov 1;15(11):454–459.
9. Xu W, Jameson D, Tang B, Higgs PG. The relationship between the rate of molecular evolution and the rate of genome rearrangement in animal mitochondrial genomes. *J Mol Evol.* 2006; Sep;63(3):375–92.

10. Boore JL, Lavrov DV, Brown WM. Gene translocation links insects and crustaceans. *Nature*. 1998; Apr 16;392(6677):667–8.
11. Higgs PG, Jameson D, Jow H, Rattray M. The evolution of tRNA-Leu genes in animal mitochondrial genomes. *J Mol Evol*. 2003; Oct;57(4):435–45.
12. Lavrov DV, Brown WM, Boore JL. Phylogenetic position of the Pentastomida and (pan)crustacean relationships. *Proc Biol Sci*. 2004; Mar 7;271(1538):537–44.
13. Scouras A, Smith MJ. A novel mitochondrial gene order in the crinoid echinoderm *Florometra serratissima*. *Mol Biol Evol*. 2001; Jan;18(1):61–73.
14. Boore JL, Staton JL. The mitochondrial genome of the Sipunculid *Phascolopsis gouldii* supports its association with Annelida rather than Mollusca. *Mol Biol Evol*. 2002; Feb;19(2):127–37.
15. Bleidorn C, Eeckhaut I, Podsiadlowski L, Schult N, McHugh D, Halanych KM, Milinkovitch MC, Tiedemann R. Mitochondrial genome and nuclear sequence data support myzostomida as part of the annelid radiation. *Mol Biol Evol*. 2007; Aug;24(8):1690–701.
16. Bernt M, Braband A, Schierwater B, Stadler PF. Genetic aspects of mitochondrial genome evolution. *Mol Phylogenet Evol*. 2013; Nov;69(2):328–38.
17. Downton M, Cameron SL, Dowavici JI, Austin AD, Whiting MF. Characterization of 67 mitochondrial tRNA gene rearrangements in the Hymenoptera suggests that mitochondrial tRNA gene position is selectively neutral. *Mol Biol Evol*. 2009; Jul;26(7):1607–17.
18. Shao R, Downton M, Murrell A, Barker SC. Rates of gene rearrangement and nucleotide substitution are correlated in the mitochondrial genomes of insects. *Mol Biol Evol*. 2003; Oct;20(10):1612–9.

19. Bernt M, Bleidorn C, Braband A, Dambach J, Donath A, Fritzsche G, Golombek A, Hadrys H, Jühling F, Meusemann K, Middendorf M, Misof B, Perseke M, Podsiadlowski L, von Reumont B, Schierwater B, Schlegel M, Schrödl M, Simon S, Stadler PF, Stöger I, Struck TH. A comprehensive analysis of bilaterian mitochondrial genomes and phylogeny. *Mol Phylogenet Evol.* 2013; Nov;69(2):352–64.
20. Dowton M, Campbell NJ. Intramitochondrial recombination - is it why some mitochondrial genes sleep around? *Trends Ecol Evol.* 2001; Jun 1;16(6):269–271.
21. Lavrov DV, Boore JL, Brown WM. Complete mtDNA sequences of two millipedes suggest a new model for mitochondrial gene rearrangements: duplication and non random loss. *Mol Biol Evol.* 2002; Feb;19(2):163–9.
22. Mao M, Austin AD, Johnson NF, Dowton M. Coexistence of minicircular and a highly rearranged mtDNA molecule suggests that recombination shapes mitochondrial genome organisation. *Mol Biol Evol.* 2014; Mar;31(3):636–44.
23. San Mauro D, Gower DJ, Zardoya R, Wilkinson M. A hotspot of gene order rearrangement by tandem duplication and random loss in the vertebrate mitochondrial genome. *Mol Biol Evol.* 2006; Jan;23(1):227–34.
24. Dowton M, Belshaw R, Austin AD, Quicke DL. Simultaneous molecular and morphological analysis of braconid relationships (Insecta: Hymenoptera: Braconidae) indicates independent mt-tRNA gene inversions within a single wasp family. *J Mol Evol.* 2002; Feb;54(2):210–26.
25. Bernt M, Middendorf M. A method for computing an inventory of metazoan mitochondrial gene order rearrangements. *BMC Bioinformatics.* 2011; Oct 5;12 Suppl 9:S6.

26. Downton M, Austin AD. Evolutionary dynamics of a mitochondrial rearrangement "hot spot" in the Hymenoptera. *Mol Biol Evol.* 1999; Feb;16(2):298–309.
27. Bernt M, Braband A, Middendorf M, Misof B, Rota-Stabelli O, Stadler PF. Bioinformatics methods for the comparative analysis of metazoan mitochondrial genome sequences. *Mol Phylogenet Evol.* 2013; Nov;69(2):320–7.
28. Bernt M, Merkle D, Middendorf M, Schierwater B, Schlegel M, Stadler P. Computational methods for the analysis of mitochondrial genome rearrangements. In: Wägele JW, Bartolomeaus T, editors. *Deep Metazoan Phylogeny: the backbone of the tree of life.* Berlin: Walter De Gruyter GmbH; 2014. pp 515–530.
29. Watterson G, Ewens W, Hall T, Morgan A. The chromosome inversion problem. *J Theor Biol.* 1982; 99:1–7.
30. Blanchette M, Kunisawa T, Sankoff D. Gene order breakpoint evidence in animal mitochondrial phylogeny. *J Mol Evol.* 1999; Aug;49(2):193–203.
31. Sankoff D, Bryant D, Deneault M, Lang BF, Burger G. Early eukaryote evolution based on mitochondrial gene order breakpoints. *J Comput Biol.* 2000; 7(3-4):521–35.
32. Cosner ME, Jansen RK, Moret BM, Raubeson LA, Wang LS, Warnow T, Wyman S. A new fast heuristic for computing the breakpoint phylogeny and experimental phylogenetic analyses of real and synthetic data. *Proc Int Conf Intell Syst Mol Biol.* 2000; 8:104–15.
33. Bourque G, Pevzner PA. Genome-scale evolution: reconstructing gene orders in the ancestral species. *Genome Res.* 2002; Jan;12(1):26–36.
34. Gallut C, Barriel V. Cladistic coding of genomic maps. *Cladistics* 2002; 18:526–536.
35. Larget B, Kadane J, Simon D. A Markov chain Monte Carlo approach to reconstructing ancestral genome rearrangements; 2002. Technical Report, Carnegie Mellon University,

- Pittsburgh, PA. e-print available at  
<http://repository.cmu.edu/cgi/viewcontent.cgi?article=1185&context=statistics>
36. Moret BM, Wang LS, Warnow T, Wyman SK. New approaches for reconstructing phylogenies from gene order data. *Bioinformatics*. 2001; 17 Suppl 1:S165-73.
37. Moret BM, Wyman S, Bader DA, Warnow T, Yan M. A new implementation and detailed study of breakpoint analysis. *Pac Symp Biocomput*. 2001:583-94.
38. Moret BME, Tang JJ, Wang LS, Warnow T. Steps toward accurate reconstructions of phylogenies from gene-order data. *J Comput Syst Sci*. 2002; 65:508–525.
39. Eriksen N.  $(1 + \epsilon)$ -approximation of sorting by reversals and transpositions. *Theor Comp Sci*. 2002; 289(1):517–529
40. Bernt M, Merkle D, Ramsch K, Fritzsche G, Perseke M, Bernhard D, Schlegel M, Stadler PF, Middendorf M. CREx: inferring genomic rearrangements based on common intervals. *Bioinformatics*. 2007 Nov 1;23(21):2957–8.
41. Wang LS, Jansen RK, Moret BM, Raubeson LA, Warnow T. Fast phylogenetic methods for the analysis of genome rearrangement data: an empirical study. *Pac Symp Biocomput*. 2002:524–35.
42. Wang LS, Warnow T, Moret BM, Jansen RK, Raubeson LA. Distance-based genome rearrangement phylogeny. *J Mol Evol*. 2006; Oct;63(4):473–83.
43. Gallut C, Gabriel V. Cladistic coding of genomic maps. *Cladistics*. 2002; 18:526–536.
44. Perseke M, Bernhard D, Fritzsche G, Brümmer F, Stadler PF, Schlegel M. Mitochondrial genome evolution in Ophiuroidea, Echinoidea, and Holothuroidea: insights in phylogenetic relationships of Echinodermata. *Mol Phylogenet Evol*. 2010; Jul;56(1):201–11.
45. Telford MJ, Field et Al. Redux. *Evodevo*. 2013; Feb 12;4(1):5.

46. Telford MJ, Lowe CJ, Cameron CB, Ortega-Martinez O, Aronowicz J, Oliveri P, Copley RR. Phylogenomic analysis of echinoderm class relationships supports Asterozoa. *Proc Biol Sci.* 2014; Jul 7;281(1786).
47. Scouras A, Smith MJ. The complete mitochondrial genomes of the sea lily *Gymnocrinus richeri* and the feather star *Phanogenia gracilis*: signature nucleotide bias and unique nad4L gene rearrangement within crinoids. *Mol Phylogenet Evol.* 2006; May;39(2):323–34.
48. Philippe H, Brinkmann H, Copley RR, Moroz LL, Nakano H, Poustka AJ, Wallberg A, Peterson KJ, Telford MJ. Acoelomorph flatworms are deuterostomes related to *Xenoturbella*. *Nature.* 2011; Feb 10;470(7333):255–8.
49. Mwinyi A, Bailly X, Bourlat SJ, Jondelius U, Littlewood DT, Podsiadlowski L. The phylogenetic position of Acoela as revealed by the complete mitochondrial genome of *Symsagittifera roscoffensis*. *BMC Evol Biol.* 2010; Oct 13;10:309.
50. Rouse GW, Wilson NG, Carvajal JI, Vrijenhoek RC. New deep-sea species of *Xenoturbella* and the position of Xenacoelomorpha. *Nature.* 2016; Feb 4;530(7588):94–7.
51. Cannon JT, Vellutini BC, Smith J 3rd, Ronquist F, Jondelius U, Hejnol A. Xenacoelomorpha is the sister group to Nephrozoa. *Nature.* 2016; Feb 4;530(7588):89–93.
52. Bourlat SJ, Rota-Stabelli O, Lanfear R, Telford MJ. The mitochondrial genome structure of *Xenoturbella bocki* (phylum Xenoturbellida) is ancestral within the deuterostomes. *BMC Evol Biol.* 2009; May 18;9:107.
53. Scouras A, Beckenbach K, Arndt A, Smith MJ. Complete mitochondrial genome DNA sequence for two ophiuroids and a holothuroid: the utility of protein gene sequence and

- gene maps in the analyses of deep deuterostome phylogeny. *Mol Phylogenet Evol.* 2004; Apr;31(1):50–65.
54. Bernt M, Merkle D, Middendorf M. An algorithm for inferring mitogenome rearrangements in a phylogenetic tree. In: *Comparative Genomics, International Workshop, RECOMB-CG 2008, Proceedings. Vol. 5267 of Lecture Notes in Bioinformatics. Springer, 2008. pp. 143–157.*
55. Arndt A, Smith MJ. Mitochondrial gene rearrangement in the sea cucumber genus *Cucumaria*. *Mol Biol Evol.* 1999;8 15(8):9–16.
56. Podsiadlowski L, Braband A, Struck TH, von Döhren J, Bartolomaeus T. Phylogeny and mitochondrial gene order variation in Lophotrochozoa in the light of new mitogenomic data from Nemertea. *BMC Genomics.* 2009; Aug 6;10:364.
57. Webster BL, Copley RR, Jenner RA, Mackenzie-Dodds JA, Bourlat SJ, Rota-Stabelli O, Littlewood DT, Telford MJ. Mitogenomics and phylogenomics reveal priapulid worms as extant models of the ancestral Ecdysozoan. *Evol Dev.* 2006; Nov-Dec;8(6):502–10.
58. Staton JL, Daehler LL, Brown WM. Mitochondrial gene arrangement of the horseshoe crab *Limulus polyphemus* L.: conservation of major features among arthropod classes. *Mol Biol Evol.* 1997; Aug;14(8):867–74.
59. Lavrov DV, Lang BF. Poriferan mtDNA and animal phylogeny based on mitochondrial gene arrangements. *Syst Biol.* 2005; Aug;54(4):651–9.
60. Perez Y, Mueller CHG, Harzsch S. The Chaetognatha: an anarchistic taxon between Protostomia and deuterostomia. In: Wägele JW, Bartolomaeus T, editors. *Deep Metazoan Phylogeny: the backbone of the tree of life.* Berlin: Walter De Gruyter GmbH; 2014. pp. 49–74.

61. Cormen TH, Leiserson CE, Rivest RL, Stein C. Introduction to algorithms, 3rd ed.  
Cambridge, Massachusetts: MIT Press; 2009.
62. Genesereth MR, Nilsson NJ. Logical Foundations of Artificial Intelligence. San Mateo,  
CA: Morgan Kaufmann Publishers; 1987
63. Audemard G. Résolution du problème SAT et génération de modèles finis en logique du  
1er ordre. PhD thesis, Université de Provence, Marseille. 2001.
64. Rossi F, Van Beek P, Walsh T. Handbook of Constraint Programming (Foundations of  
Artificial Intelligence). New York: Elsevier; 2006.
65. Davis M, Putnam H. A computing procedure for quantification theory. J ACM. 1960;  
7(3):201–215.
66. Davis M, Logemann G, Loveland D. A Machine Program for Theorem Proving. C ACM.  
1962; 5(7):394–397.
67. Krishnamurthy B. Short proofs for tricky formulas. Acta Informatica. 1985; 22:253–274.
68. Gent I, Smith B. Symmetry breaking in constraint programming. In Horn W, editor. Proc  
14th Euro. Conf. on AI, pages 599–603, Berlin: IOS Press; 2000. pp. 599–603.

## Supporting Information

- S1 appendix.** Exact minimal distances matrix calculated with genome\_comparison.c  
program.
- S2 appendix.** Logbook 1 - Chronological description of computations for Bilateria.
- S3 appendix.** Axioms and solutions for Deuterostomia.
- S4 appendix.** Axioms and solutions for Ecdysozoa.
- S5 appendix.** Axioms and solutions for Lophotrochozoa.
- S6 appendix.** Axioms and solutions for Bilateria.



**S7 appendix.** Axioms and solutions for Chaetognatha.

**S8 appendix.** Logbook 2 - Chronological description of computations for Bilateria - Annex for Chaetognatha.

**S9 appendix.** List of primary phylogenetic hypotheses (PPHs).

**Fig 1. The two most parsimonious mutational networks (12 steps) based on the arrangement of protein-coding and ribosomal RNA genes in the deuterostomes mtDNAs.**

The maximum parsimony mutational links among the networks are indicated by solid lines (blue, inversion; green, transposition; purple, reverse transposition). Hypothetical ancestral mtDNAs (HTUs) are indicated at each node of the trees by grey dots. Orange-circled dots correspond to ground patterns of clades. Ur-echinodermata is represented by the mtDNA of either *Strongylocentrotus purpuratus* (A) or *Asterina pectinifera* (B). Grey-shaded boxes on diagrammatic representations of hypothetical ancestral mtDNAs (HTU#1a to 3b) highlight genes transcribed from the opposite strand.

**Fig 2. Mutational networks based on the arrangement of all the mt genes in echinoderms.**

(A) One tree solution for the whole Echinodermata group showing a possible mutational network calculated with all mitochondrial genes (including tRNA genes). Among the 25 necessary steps, more than 6 involve the mitochondrial coding-protein and rRNA genes. (B) Tree solution calculated with mitochondrial protein-coding and rRNA genes with *Asterina pectinifera* as Ur-echinodermata (Fig 1B) on which 20 necessary permutations of tRNA genes have been added *a posteriori*. Among the 26 steps, 6 involve the mitochondrial coding-protein

and rRNA genes.

**Fig 3. The six most parsimonious mutational networks based on the rearrangements of protein-coding and rRNA genes in bilaterian mtDNAs.**

The maximum parsimony mutational links among the networks are indicated by solid lines (blue, inversion; green, transposition; purple, reverse transposition). Hypothetical ancestral mtDNAs are indicated at each node of the trees by grey dots. Orange-circled dots correspond to ground patterns of deuterostomes, ecdysozoans and lophotrochozoans. Orders of mitochondrial protein-coding and rRNA genes of HTU#1 to 8 are given in Table 3.

**Fig 4. Diagram of three possible transpositions in a circular genome leading to a same gene order.**

Because of the circularity of the genome, there are always three possible transpositions leading to a similar gene order ( $[BAC] = [ACB] = [CBA]$ ) from a given gene order ( $[ABC]$ ). Thus, it is not possible to determine which gene or block of genes is concerned by a transposition. In each example, the block that is being transposed is underlined. The black arrowheads indicate where the transposed block will be inserted (insertion points).

A

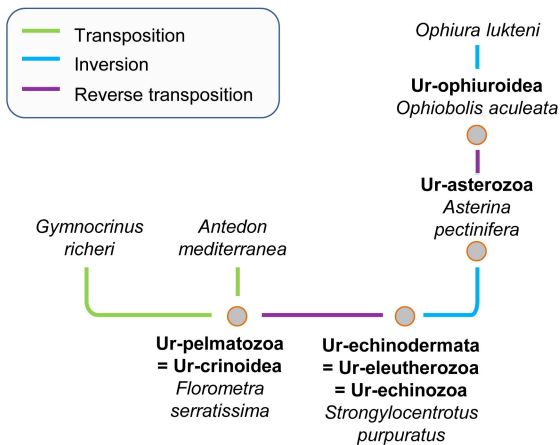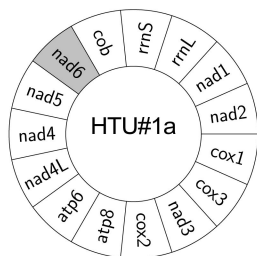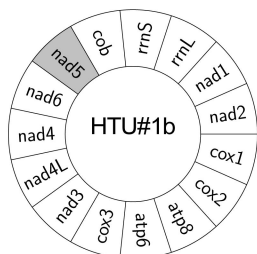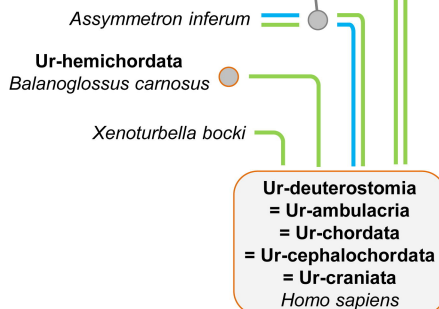

B

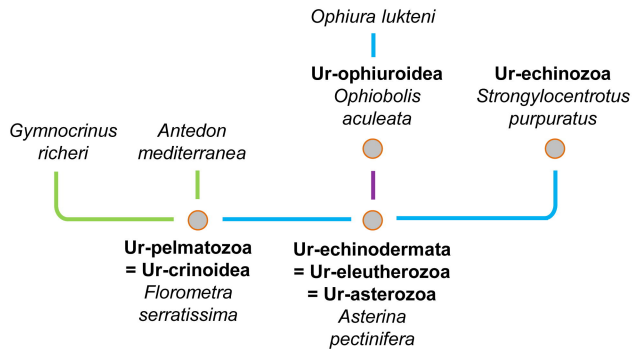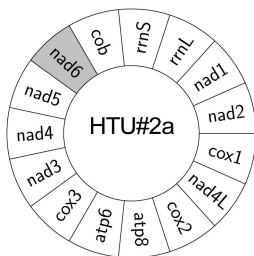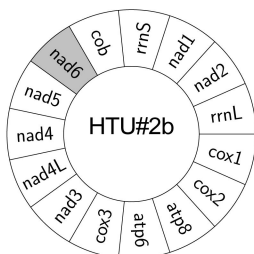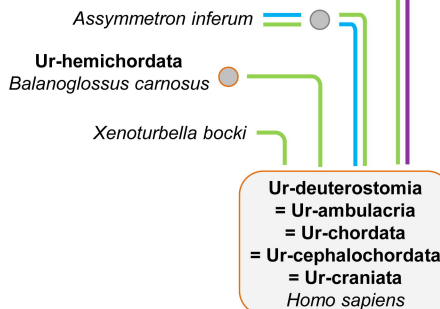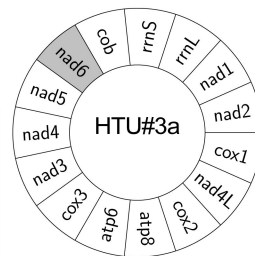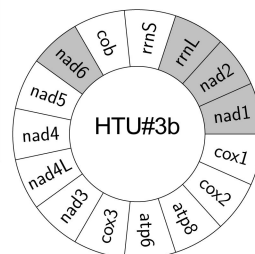

A

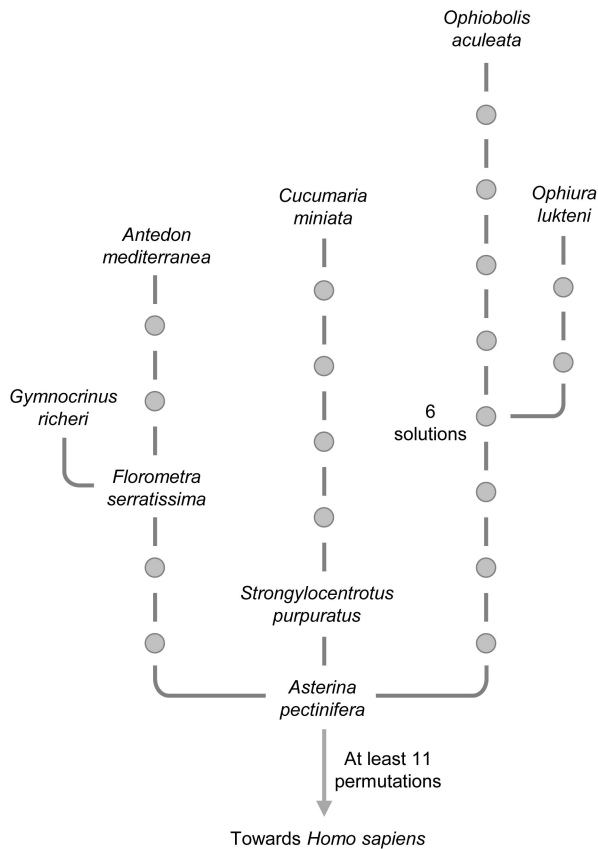

B

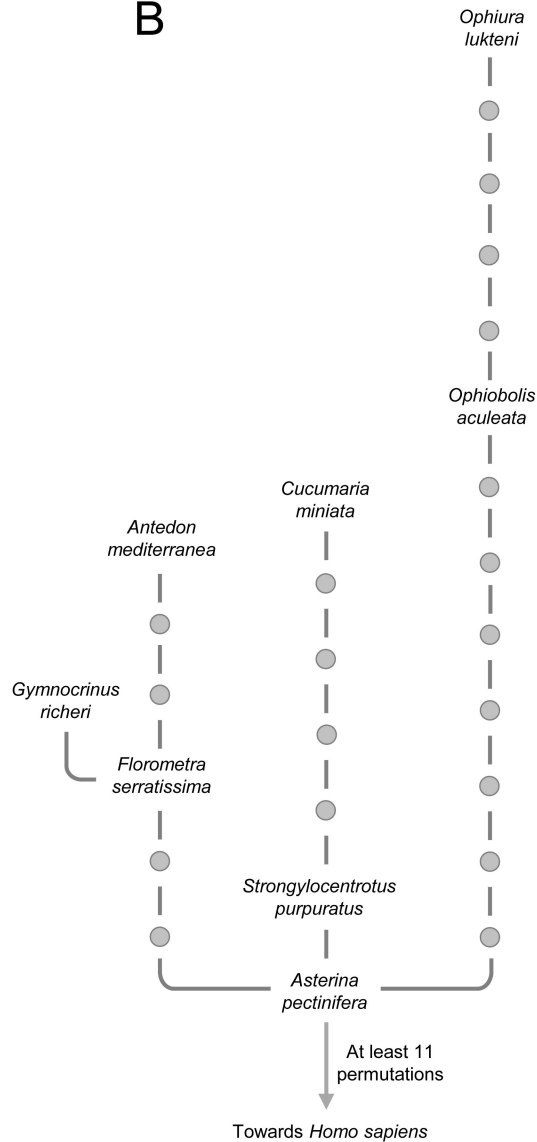

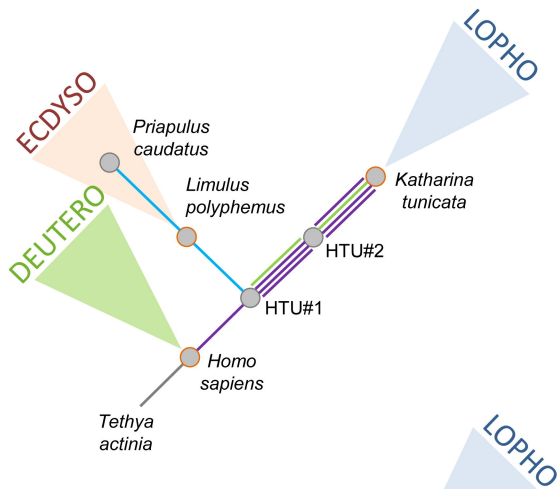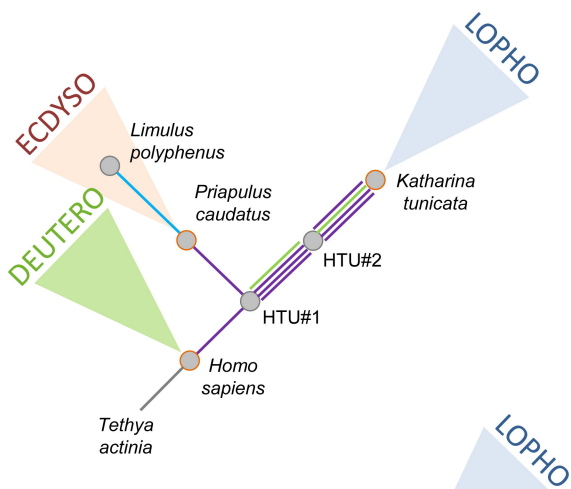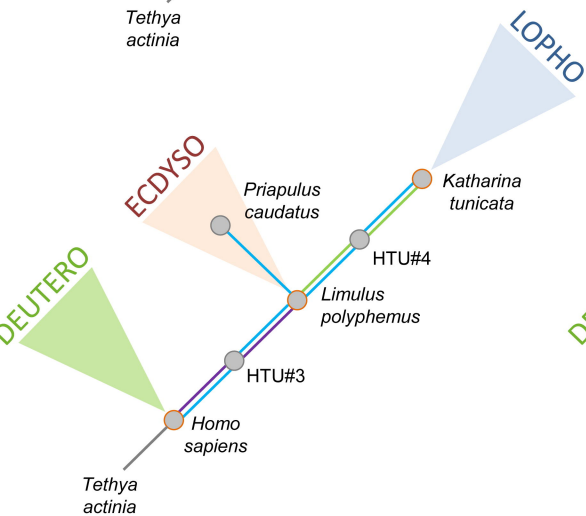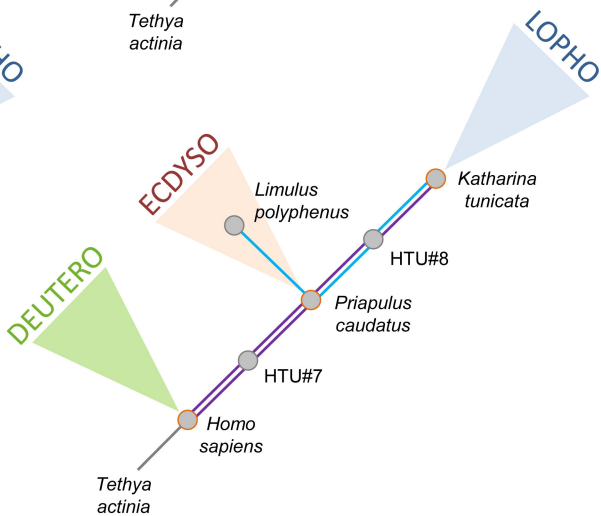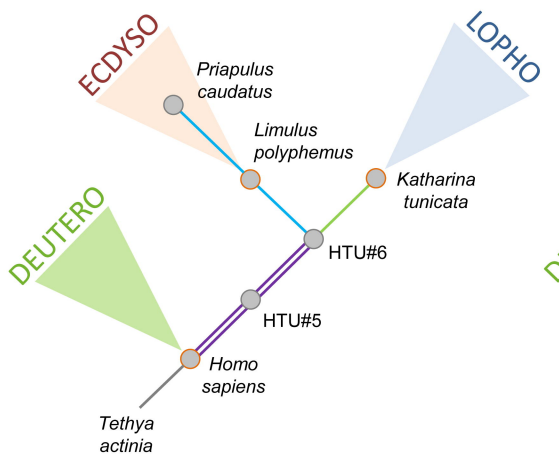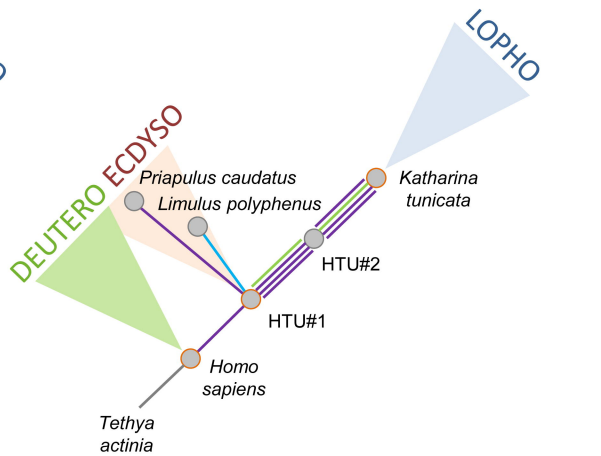

[ABC]

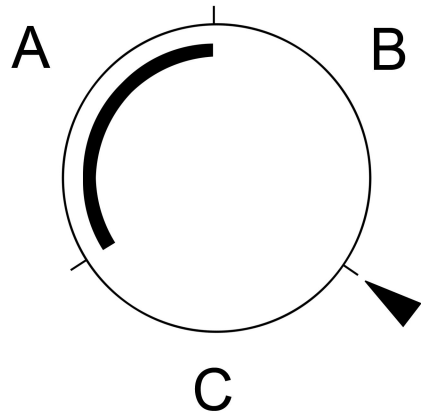

[ABC]

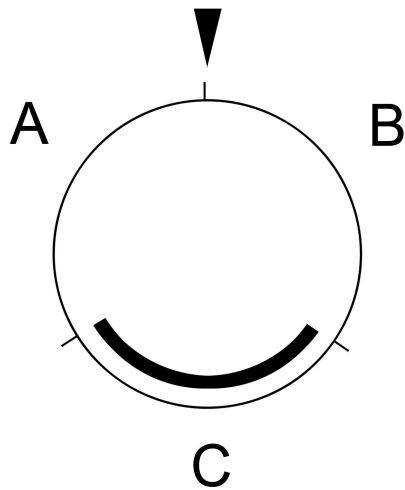

[ABC]

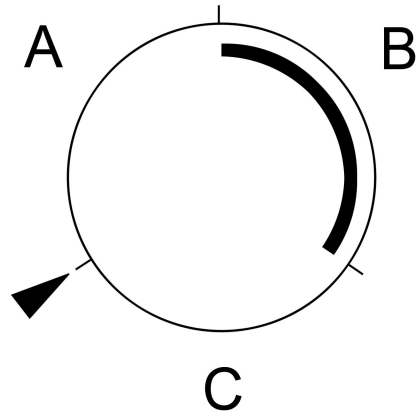

[BAC] = [ACB] = [CBA]
